1

2

## Oxytocin amplifies sex differences in human mate choice

3

4

5 Lei Xu<sup>1</sup>, Benjamin Becker<sup>1</sup>, Ruixue Luo<sup>1</sup>, Xiaoxiao Zheng<sup>1</sup>, Weihua Zhao<sup>1</sup>, Qiong Zhang<sup>1</sup>  
6 and Keith M. Kendrick<sup>1\*</sup>

7

8 <sup>1</sup>The Clinical Hospital of Chengdu Brain Science, MOE Key Laboratory for  
9 NeuroInformation, University of Electronic Science and Technology of China, Chengdu  
10 611731, China.

11

12

13 \*Corresponding author:

14 Keith M. Kendrick

15 Address: The Clinical Hospital of Chengdu Brain Science, MOE Key Laboratory for  
16 NeuroInformation, University of Electronic Science and Technology of China,  
17 No. 2006, Xiyuan Ave, West Hi-tech Zone, Chengdu 611731, China.

18 E-mail: [kkendrick@uestc.edu.cn](mailto:kkendrick@uestc.edu.cn)

19 Tel: 86-28-83201358.

20 Fax: 86-28-83201358.

21

22

23 **Keywords:** oxytocin, sex difference, mate choice, evolutionary theory, infidelity

24 **Abstract**

25 **Infidelity is the major cause of partnership breakups across cultures and individuals with**  
26 **a history of infidelity are more likely to repeat it, although they may also present a greater**  
27 **opportunity for short-term sexual relationships. Here we have firstly investigated sex-**  
28 **differences in the attractiveness and perceived relationship potential of individuals who**  
29 **have exhibited fidelity or infidelity in a previous relationship. We also examined whether**  
30 **these sex differences are amplified by the neuropeptide oxytocin which promotes partner**  
31 **bonds but may also enhance sex-differences in social priorities. While both sexes valued**  
32 **faithful individuals most for long-term relationships, men were more interested in having**  
33 **short-term relationships with previously unfaithful individuals than women, irrespective**  
34 **of current relationship status. Oxytocin administration increased men's attraction to**  
35 **unfaithful women and wanting short-term relationships with them, whereas women**  
36 **became more averse to unfaithful men and instead exhibited an even greater preference**  
37 **for having long-term relationships with faithful ones. The oxytocin effect on relationship-**  
38 **choice was only found in single individuals in line with their higher priority for finding a**  
39 **prospective partner. Thus, oxytocin release during courtship may first act to amplify sex-**  
40 **dependent priorities in attraction and mate choice before subsequently promoting**  
41 **romantic bonds with preferred individuals.**

42

43 Individuals who have previously been unfaithful in a relationship are over 3 times more  
44 likely to repeat this in subsequent ones<sup>1</sup>, and infidelity is the most common cause of divorce<sup>2</sup>.  
45 Infidelity in a partner represents a long-term relationship risk to both sexes that can particularly

46 impact negatively on females in terms of loss of support for raising offspring but for males may  
47 also increase the risk of being cuckolded and raising another male's offspring<sup>3</sup>. Indeed, it is  
48 argued that this difference in the perceived risk of infidelity by the sexes is reflected in women  
49 being more concerned by emotional infidelity but men by sexual infidelity<sup>4,5</sup>. However, while  
50 both sexes clearly prefer fidelity in a prospective long-term partner men across cultures are  
51 more likely to pursue short-term relationships and engage in casual sex in order to increase  
52 their reproductive potential<sup>3,6</sup>, although women may also do so to maximize their chance of  
53 reproducing with more masculine men who have the highest levels of genetic fitness<sup>7</sup>. Rates of  
54 infidelity are highest in powerful individuals of both sexes who are also likely to have higher  
55 testosterone and therefore good genes<sup>8</sup>. There is also an element of social learning in mate  
56 choice: "wanting women other men want or vice versa", known as "mate choice copying"<sup>9</sup>  
57 which could be evidenced by knowledge that individuals have had multiple affairs. As Scott  
58 Fitzgerald wrote of Gatsby's perception of Daisy in "The Great Gatsby"<sup>10</sup>: "It excited him, too,  
59 that many men had already loved Daisy – it increased her value in his eyes". Overall therefore,  
60 individuals with a previous history of infidelity could be considered as more attractive for  
61 short-term relationships, due to a greater perceived potential availability for reproduction  
62 opportunities and possibly greater genetic fitness.

63 One potential candidate for a role in influencing sex differences in mate choice is the highly  
64 evolutionarily conserved neuropeptide oxytocin which plays a key role in the formation and  
65 maintenance of affiliative and partner bonds in a number of species<sup>11,12</sup>, including humans<sup>13–</sup>  
66 <sup>15</sup>, as well as in social learning<sup>16</sup> and conformity<sup>17,18</sup>. In humans, oxytocin facilitates sex-  
67 dependent differences in social priorities, particularly in terms of positive or negative social

68 attributes<sup>19-21</sup>. Oxytocin can also sex-dependently facilitate approach or avoidance behavior  
69 towards attractive strangers of the opposite sex although its effects can be modulated by  
70 relationship status<sup>13</sup>. However, it is currently unknown whether oxytocin may influence sex-  
71 differences in human mate-choice priorities. Here in a pre-registered, randomized, double-  
72 blind, placebo-controlled trial study involving 160 subjects (80 females, see Fig. 1), we have  
73 therefore investigated whether sex-dependent biases in patterns of mate choice revealed by  
74 knowledge of previous emotional or sexual fidelity/infidelity in men and women who are  
75 currently single, or in a committed relationship, are influenced by intranasal oxytocin  
76 administration. We used a paradigm where subjects rated attraction towards, and interest in  
77 having short- or long-term relationships with, unfamiliar men or women when presented with  
78 their face pictures paired with descriptions of examples of faithful or unfaithful behavior in a  
79 previous relationship.

80 We specifically hypothesized that in line with previous research the control placebo-  
81 treated group men would exhibit a greater attraction towards, and preference for having a short-  
82 term relationship with individuals who had previously been unfaithful compared to women.  
83 We also hypothesized based on previous findings that women would be more influenced by  
84 previous emotional fidelity and infidelity whereas men would be more influenced by sexual  
85 fidelity and infidelity. Finally, based on previous findings we hypothesized that oxytocin  
86 administration would amplify or even generate sex-differences in attraction to, and choice of  
87 short vs. long-term relationships with, individuals who had exhibited examples of emotional  
88 or sexual fidelity or infidelity behavior in a previous relationship.

89

## 90 **Results**

### 91 **Sex-differences on the impact of knowledge of previous fidelity or infidelity**

92 To identify treatment-independent sex differences on evaluations of a potential partner who  
93 had previously displayed infidelity or fidelity in a relationship, we first analyzed data from the  
94 placebo control group using four-way repeated-measures ANOVAs with fidelity (fidelity vs.  
95 infidelity) and type (emotional vs. sexual) as within-subject factors and sex and relationship  
96 status as between-subject factors. For ratings of the face pictures paired with examples of  
97 fidelity or infidelity behaviors there was a significant type x sex interaction for attraction  
98 ratings ( $F(1,76) = 5.308, p = 0.024, \eta^2_p = 0.065$ ; attraction was calculated using an average of  
99 facial attractiveness and personal liking ratings since they were highly correlated,  $r = 0.829, p$   
100  $< 0.001$ , but see SI for a separate analysis). Post hoc comparisons revealed that women rated  
101 men who showed emotional fidelity or infidelity more attractive than those who showed sexual  
102 fidelity or infidelity ( $p = 0.004, d = 0.553$ ). An additional analysis using the attraction rating  
103 difference between emotional and sexual fidelity revealed that in comparison with men, women  
104 rated individuals exhibiting emotional fidelity significantly higher than those exhibiting sexual  
105 fidelity ( $t(78) = 2.203, p = 0.031, d = 0.493$ ). There were no sex-differences for other ratings or  
106 the memorability of faithful or unfaithful individuals.

107 Analysis of mate choice for a short-term relationship in the placebo group revealed a  
108 significant fidelity x sex interaction ( $F(1,76) = 4.051, p = 0.048, \eta^2_p = 0.051$ ). Post-hoc  
109 comparisons showed that men were more interested than women in having a short-term  
110 relationship with a previously unfaithful individual ( $p = 0.002, d = 0.739$  – see Fig. 2a). Indeed,  
111  $32.4 \pm 3.6\%$  (mean  $\pm$  sem) of responses made by men expressed interest (i.e. “yes” or “maybe”

112 decisions) in having a short-term relationship with an unfaithful individual, whereas only 17.0  
113  $\pm$  3.6% of responses made by women did ( $p = 0.004$ ,  $d = 0.677$  – see Fig. 2b). There was also  
114 a significant fidelity x type x sex x relationship status interaction ( $F(1,76) = 4.448$ ,  $p = 0.038$ ,  
115  $\eta^2_p = 0.055$ ) with post-hoc tests revealing that single men preferred to have short term  
116 relationships with individuals who had exhibited sexual fidelity than women ( $p = 0.022$ ,  $d =$   
117  $0.672$ ). There was also a similar trend for this with long-term relationships although the  
118 interaction did not achieve significance ( $F(1,76) = 3.861$ ,  $p = 0.053$ ,  $\eta^2_p = 0.048$ ). There were  
119 no sex differences in the percentage of responses by subjects expressing an interest in having  
120 long-term relationships with faithful individuals ( $43.1 \pm 4.8\%$  of responses by men and  $47.9 \pm$   
121  $4.8\%$  by women -  $p = 0.487$ ). A separate analysis on female subjects found no evidence for a  
122 significant influence of menstrual cycle stage (i.e. whether women were at a stage representing  
123 either a high or low risk of conception) on any of the measures taken (see SI).

124 Thus our findings in the placebo group demonstrate a clear sex-dependent bias in mate  
125 choice with men expressing a greater interest than women in having short-term relationships  
126 with previously unfaithful individuals. In addition, and in line with previous studies, we found  
127 some evidence for sex-differences in responses to emotional and sexual fidelity, with females  
128 finding emotionally faithful males more attractive and males being more interested in having  
129 short-term relationships with faithful women who had exhibited sexual fidelity.

### 130 **Effects of intranasal oxytocin on sex-differences in mate choice**

131 To examine the effects of oxytocin on evaluations of potential partners showing previous  
132 fidelity or infidelity, five way repeated-measures ANOVAs with fidelity (fidelity vs. infidelity)  
133 and type (emotional vs. sexual) as within-subject factors and treatment, sex and relationship

134 status as between-subject factors were performed on rating scores, recognition memory and  
135 mate choice. There was a significant fidelity x treatment x sex interaction ( $F(1,152) = 8.172$ ,  $p$   
136  $= 0.005$ ,  $\eta^2_p = 0.051$ ) for attraction ratings. Post-hoc comparisons showed that compared to  
137 placebo oxytocin significantly increased men's attraction ratings for women who had  
138 previously been unfaithful ( $p = 0.017$ ,  $d = 0.506$ ), whereas it correspondingly decreased the  
139 attractiveness of unfaithful men to women ( $p = 0.044$ ,  $d = 0.446$ ; see Fig. 3a). Thus, unlike the  
140 placebo group, in the group treated with oxytocin there was a significant sex difference in  
141 attraction ratings for previously unfaithful individuals ( $p < 0.001$ ,  $d = 1.115$ ). There were no  
142 significant sex-dependent effects of oxytocin on attraction ratings given to previously faithful  
143 men ( $p = 0.814$ ) and women ( $p = 0.767$ ) and it did not alter the pattern of female subjects giving  
144 higher ratings than men for emotionally compared to sexually faithful individuals (type x  
145 treatment x sex interaction:  $p = 0.394$ ; fidelity x type x treatment x sex interaction:  $p = 0.998$ ).  
146 See Fig. S1 for facial attractiveness and personal liking ratings separately. No significant  
147 effects involving treatment and gender were found for trustworthiness or arousal ratings  
148 indicating that sex-dependent effects of oxytocin on attraction ratings were specific.

149 Analysis of recognition memory accuracy for faces revealed a significant fidelity x  
150 treatment x sex interaction ( $F(1,148) = 4.971$ ,  $p = 0.027$ ,  $\eta^2_p = 0.032$ ; note: for this analysis 4  
151 subjects were excluded due to incomplete data). Post-hoc comparisons demonstrated that  
152 women in the oxytocin group were less likely than women in the placebo group to remember  
153 the faces of individuals who had previously exhibited infidelity ( $p = 0.007$ ,  $d = 0.608$ ; see Fig.  
154 3b). Oxytocin therefore effectively increased the chances that women would only remember  
155 men with a history of being faithful.

156 For short-term relationship preference, analysis revealed a significant fidelity x type x  
157 treatment x sex x relationship status interaction ( $F(1,152) = 4.384, p = 0.038, \eta^2_p = 0.028$ ).  
158 Post-hoc comparisons showed that oxytocin selectively increased single men's interest (using  
159 a derived interest index) in having a short-term relationship with women exhibiting previous  
160 sexual infidelity ( $p = 0.042, d = 0.518$ , see Fig. 4a), but not for men already in a relationship ( $p$   
161  $= 0.634$ ). In a separate confirmatory analysis which used the percentage of yes/maybe  
162 responses given by single men for having a short-term relationship with sexually unfaithful  
163 women we found that this increased from  $29.5 \pm 4.9\%$  in the placebo group to  $45.8 \pm 5.0\%$  in  
164 the oxytocin group ( $p = 0.021, d = 0.604$  – see Fig. S2). For interest in having a long-term  
165 relationship there was a significant fidelity x treatment x sex x relationship status interaction  
166 ( $F(1,152) = 5.567, p = 0.020, \eta^2_p = 0.035$ ). Post-hoc comparisons showed that oxytocin only  
167 increased single women's interest in having a long-term relationship with men exhibiting  
168 previous fidelity of any type ( $p = 0.025, d = 0.700$ , see Fig. 4b). Once again this was confirmed  
169 by a separate analysis of the percentage of yes/maybe responses made by single women for  
170 having a long-term relationship with faithful men which increased from  $41.7 \pm 6.8\%$  in the  
171 placebo group to  $64.1 \pm 6.4\%$  in the oxytocin group ( $p = 0.018, d = 0.699$  – see Fig. S2). In  
172 female subjects, menstrual cycle stage did not influence the oxytocin effects found above (see  
173 SI). Thus, in terms of mate choice, oxytocin increased interest in single men for having short-  
174 term relationships specifically with sexually unfaithful women, whereas for single women it  
175 increased their interest in having long-term relationships with faithful men in general.

176

177 **Discussion**



178 Overall, our findings demonstrate firstly that in support of our hypothesis knowledge of  
179 previous fidelity and infidelity in a prospective heterosexual partner effectively reveals sex  
180 differences in mate choice strategy. Thus, men in the control placebo treated group generally  
181 exhibited greater interest in having a short-term relationship with previously unfaithful  
182 individuals than women, and independent of relationship status. However, in the context of  
183 long-term relationships we did not observe a predicted sex difference, with both sexes showing  
184 an equivalent and greater preference for partners exhibiting previous fidelity. In support of  
185 previous findings<sup>4,5</sup> women rated individuals exhibiting emotional as opposed to sexual fidelity  
186 as more attractive than men, with men effectively showing the opposite pattern.

187 Compared to placebo treatment, oxytocin administration firstly created sex-differences in  
188 the influence that knowledge of previous fidelity or infidelity had on attractiveness ratings and  
189 memory for prospective partners but importantly had no effect on potential confounders such  
190 as arousal and trustworthiness ratings and effects were independent of relationship status. More  
191 specifically, oxytocin increased men's attractiveness ratings of previously unfaithful women  
192 but correspondingly decreased those for unfaithful men by women. Furthermore, following  
193 oxytocin women found the face pictures of men associated with previous infidelity less  
194 memorable suggesting that they would be more likely to only remember faithful individuals.  
195 Interestingly however oxytocin did not alter the sex-specific preferences for the attractiveness  
196 ratings given to individuals who had previously exhibited emotional (female) as opposed to  
197 sexual (male) fidelity. This may reflect the fact that oxytocin effects on sex-differences were  
198 mainly in the context of interest in previous infidelity or that it may have less influence on such  
199 strongly established within-sex patterns of preference. Both the sex-differences observed in the

200 placebo group and in response to oxytocin treatment were all medium or large effect sizes both  
201 confirming the appropriateness of the power analysis for the study (see SI) and supporting the  
202 robustness of the findings.

203 While oxytocin's sex-dependent effects on attraction ratings and memory for faces  
204 occurred irrespective of relationship status, those for increasing interest in having short or long-  
205 term relationships were restricted to single individuals. This finding supported our hypothesis  
206 that oxytocin would enhance current social and reproductive priorities in both sexes<sup>20,22</sup>, with  
207 single individuals having a higher priority for seeking a potential partner. That oxytocin  
208 primarily increased single men's interest in having short-term relationships with women who  
209 had been sexually, as opposed to emotionally, unfaithful might also reflect a higher priority for  
210 gaining sexual access to females in single men. Similarly, single women's increased interest in  
211 faithful males, and decreased interest in and memory for unfaithful ones, may reflect a higher  
212 priority for avoiding potential philandering males.

213 Oxytocin release associated with partner bonding across species is primarily evoked by  
214 mating or sexual arousal as well as by social touch<sup>22</sup>, and can even occur in response to visual  
215 cues from the face<sup>23</sup>. While there is some evidence that oxytocin can increase the perceived  
216 attractiveness of the faces of unfamiliar members of the opposite sex<sup>22</sup> our current findings  
217 emphasize that its release during initial flirtation might serve to focus attention on pertinent  
218 information concerning a prospective partner's behavior and history and not merely on their  
219 physical appearance. Indeed, previous studies have also demonstrated that intranasal oxytocin  
220 administration can potently, and sex-dependently, alter behavioral and neural responses to  
221 faces when they are paired with information on positive or negative social qualities<sup>20</sup> and

222 reduce recognition speed for positive romantic and bonding-related words<sup>24</sup>. Thus, while  
223 oxytocin release can ultimately promote the formation of partner bonds, it may first play a key  
224 role in highlighting the attractiveness of personal characteristics in a prospective partner which  
225 best match an individual's current specific priorities. It pays therefore for both sexes to know  
226 first, for example, who are “stayers” and who are “strayers”, as well as other salient  
227 characteristics, so that oxytocin release during romantic encounters will ultimately promote  
228 bonds with the most appropriate partners in terms of current mate-choice priorities.

229

## 230 **Methods**

231 **Participants.** 160 heterosexual subjects (80 males, age range 18-27 years) were recruited to  
232 take part in a double-blind, placebo-controlled, between-subject design experiment. An initial  
233 power analysis showed that with this number of subjects the study had 80.7% statistical power  
234 for detecting treatment and gender effects with a medium effect size of 0.45 (fpower.sas). All  
235 subjects had normal or corrected-to-normal vision, were not color-blind and reported no history  
236 of or current neurological or psychiatric disorders. Subjects were free of regular and current  
237 use of medication and instructed to abstain from caffeine, nicotine and alcohol intake the day  
238 before and on the day of the experiment. None of the female subjects was pregnant or using  
239 oral contraceptives or tested at specific stages of their menstrual cycle. Using date of onset of  
240 previous menses and cycle length ( $30.83 \pm 0.37$  days) provided by the subjects we estimated  
241 (backward counting<sup>25</sup>) whether they were in follicular phase (between the end of menses and  
242 ovulation, high conception risk) or luteal phase (after ovulation and before the onset of menses,  
243 low conception risk) on the experimental day<sup>7</sup>. ~~Eight~~Seven females reported having irregular

244 menstrual cycles and were excluded for menstrual cycle related analysis. The proportion in  
245 their follicular ( $n = 39$ ; 22 in oxytocin group) or luteal ( $n = 33$ ; 16 in oxytocin group; Fisher's  
246 test:  $p = 0.636$ , two-sided) phases did not differ between the groups. There were no significant  
247 menstrual cycle effects found for results obtained in the study itself (see SI). Both subjects who  
248 were currently single ( $n = 82$ ; 39 males) and those who were currently in a committed  
249 relationship of  $> 6$  months duration ( $32.00 \pm 2.45$  months;  $n = 78$ ; 43 males) were included  
250 since relationship status can modulate oxytocin effects in men<sup>13,26</sup>. All single subjects were  
251 interested in finding a romantic partner and those in a relationship reported that it was a stable  
252 exclusive one (indeed subjects in a relationship scored significantly higher on the passionate  
253 love scale than single subjects ( $102.09 \pm 1.55$  vs.  $96.39 \pm 1.69$  -  $t(158) = 2.478$ ,  $p = 0.014$ ,  $d =$   
254  $0.392$ ) providing further support for their being in love). All subjects signed written informed  
255 consent and received monetary compensation for their participation. The study was approved  
256 by the local ethics committee at the University of Electronic Science and Technology of China  
257 and was in accordance with the latest revision of the Declaration of Helsinki. The study was  
258 also pre-registered on the NIH registration website (clinicaltrials.gov NCT02733237).

259 To control for potential confounds, before intranasal treatment all subjects completed a  
260 range of validated questionnaires (Chinese versions) measuring mood, personality traits and  
261 attitudes toward love, trust and forgiveness. These included: Positive and Negative Affective  
262 Schedule – PANAS<sup>27</sup>; NEO-Five Factor Inventory – NEO-FFI<sup>28</sup>; Self-Esteem Scale – SES<sup>29</sup>;  
263 Interpersonal Reactivity Index – IRI<sup>30</sup>; Autism Spectrum Quotient – ASQ<sup>31</sup>; Beck's Depression  
264 Inventory – BDI<sup>32</sup>; Leibowitz's Social Anxiety Scale – LSAS<sup>33</sup>; Passionate Love Scale – PLS<sup>34</sup>;  
265 Love Attitude Scale – LAS<sup>35</sup>; General Trust Scale – GTS<sup>36</sup>; Tendency to Forgive Scale – TTF<sup>37</sup>;

266 Attitudes toward Forgiveness Scale – ATF<sup>37</sup>; Trait Forgivingness Scale – TFS<sup>38</sup>. Multivariate  
267 ANOVA on questionnaires and age showed no significant differences between the oxytocin-  
268 and placebo-treated males and females (sex x treatment interaction: all  $ps > 0.090$ ; See Table  
269 S1).

270 **Intranasal administration.** Subjects were randomly assigned to receive intranasal  
271 administration of either oxytocin ( $n = 80$ , 40 males and 40 females; 40 IU; Oxytocin-Spray,  
272 Sichuan Meike Pharmaceutical Co. Ltd, China; 5 puffs of 4 IU per nostril with a 30s between  
273 each puff) or placebo ( $n = 80$ , 40 males and 40 females; identical sprays with the same  
274 ingredients other than the neuropeptide, i.e., glycerin and sodium chloride) following a  
275 standardized protocol<sup>39</sup>. In previous studies, we have found similar behavioral and neural  
276 effects of 24 and 40IU oxytocin doses, although in our studies the higher dose tends to produce  
277 more consistent results<sup>40,41</sup> and this was recently supported by a study from another group  
278 showing dose-dependent effects using these same doses<sup>42</sup>. We therefore decided to use the  
279 higher 40 IU dose here to try and maximize effects. Although we could not measure blood or  
280 cerebrospinal fluid oxytocin concentrations following intranasal application other studies have  
281 reported that they produce only relative small increases within the general physiological  
282 range<sup>43,44</sup>. Subjects and experimenter were blind to drug condition. In post experiment  
283 interviews subjects were unable to guess better than chance whether they had received oxytocin  
284 or placebo treatment (79 subjects guessed correctly;  $\chi^2 = 0.025$ ,  $p = 0.874$ ). In line with  
285 standardized recommendations<sup>39</sup> and two studies reporting pharmacodynamics of central  
286 effects of intranasal OXT in humans<sup>45,46</sup> the experimental paradigm started 45 minutes after  
287 intranasal treatment. While it is currently unclear whether functional effects of intranasal

288 oxytocin are mediated via direct effects on the brain or indirectly via peripheral effects, it has  
289 been established that oxytocin administered via this route does enter into the brain  
290 cerebroventricular system in monkeys<sup>47</sup> and alters cerebral blood flow in an extensive number  
291 of brain regions known to express oxytocin receptor mRNA in humans<sup>45</sup>. A recent study  
292 comparing functional and brain effects of intranasal and intravenous oxytocin administration  
293 have only found effects when it is given intranasally<sup>48</sup>.

294 **Stimuli.** Before the formal experiment, we generated 54 sentences describing a behavior  
295 indicative of fidelity or infidelity (either emotional or sexual; 12~14 sentences for each  
296 behavior type) that a male or female individual had performed during a past relationship.  
297 Sexual and emotional infidelity were defined as in Takahashi et al<sup>49</sup>. Sexual infidelity (fidelity)  
298 included situations where a (or no) sexual relationship or deep physical contact with other  
299 members of the opposite sex was indicated explicitly or implicitly. Emotional infidelity  
300 (fidelity) included situations indicating some (or no) form of romantic emotional response or  
301 commitment to other members of the opposite sex. Each sentence was written in Chinese, used  
302 the past tense and had male and female versions (i.e. “She.....” for male subjects in the study  
303 and “He.....” for female subjects). In a pre-study, an independent sample of forty volunteers  
304 (21 males) were asked to decide whether the behavior described was an example of emotional  
305 or sexual infidelity/fidelity and also to rate how strong it was using a 9-point scale. Based on  
306 the data from this pre-study, we selected 40 sentences (10 for each behavior type) with a high  
307 discrimination between sexual and emotional fidelity or infidelity (i.e. all the chosen sentences  
308 were correctly classified as representing fidelity or infidelity behaviors by the raters and with  
309 a mean accuracy of 87.6% for distinguishing emotional from sexual examples). There were no

310 differences between male and female examples in terms of discrimination accuracy or strength  
311 (all  $ps > 0.258$ ). Table S2 gives examples of the fidelity/infidelity behavior sentences.

312 Facial images of 80 males and 80 females with neutral expressions were selected from an  
313 in-house database of 260 face images following a pilot rating by 36 subjects (17 males) of  
314 valence, attractiveness, trustworthiness, likability of the faces from the opposite sex as well as  
315 how aroused they were by them. All face images were carefully edited (removing accessories  
316 or background details, but keeping hair, ears and neck) and presented in full color at a 600×800  
317 Pixel resolution on a black background (faces life-size). All selected faces were rated as having  
318 a neutral valence (emotional valence: range 4.3-6.0; mean = 5.09). Half of the faces used for  
319 the rating task were divided randomly into four groups (i.e. 10 faces per group for each sex).  
320 Mean attractiveness, valence, trustworthiness and arousal ratings of the faces in each group did  
321 not differ significantly for both male and female faces (ANOVAs all  $ps > 0.964$ ). Each group  
322 of faces was assigned for pairing with sentences describing one of the four different  
323 fidelity/infidelity types. Additionally, to control for possible face/sentence-group differences,  
324 the pairings of face group and sentence type were randomized across individual subjects in the  
325 main study. The remaining faces were used as novel stimuli in the recognition memory test and  
326 had equivalent valence, attractiveness, trustworthiness, likability and arousal ratings compared  
327 to the faces paired with sentences for both sexes (all  $ps > 0.727$ ).

328 **Procedure.** The experimental task (see Fig. 1) was presented on a computer with a 27-inch  
329 monitor (screen resolution: 1920\*1080 pixels; refresh rate: 60 Hz). In the rating task, subjects  
330 viewed neutral expression face pictures of 40 unfamiliar members of the opposite sex with  
331 average attractiveness paired with verbal information describing examples of how they had

332 been either emotionally or sexually faithful or unfaithful during a previous relationship (see  
333 Table S2). We included fidelity type as a factor since previous research has reported that men  
334 are more influenced by sexual infidelity and women by emotional infidelity<sup>4,5</sup>. Subjects were  
335 told that these individuals were currently single and instructed to view their faces, read the  
336 sentences describing their previous behavior silently and then rate (on a 9-point scale) their  
337 attractiveness, likeability and trustworthiness, and arousal elicited by them, based on their  
338 overall impression of them. Next, subjects were asked whether they would like to have a short-  
339 or long-term romantic relationship with the person (response options: “yes”, “maybe” or “no”  
340 - see Fig.1). There was no time limitation for subjects’ responses. For the main analysis, the  
341 decisions “yes”, “maybe” and “no”, were scored numerically as 2, 1 and 0 respectively and this  
342 was used to create an overall “Interest Index” indicating willingness to have a relationship with  
343 the person. A separate confirmatory analysis was also performed using the percentage of  
344 “yes/maybe” responses made by subjects (see SI).

345 Finally, subjects completed a surprise recognition memory test for these 40 faces  
346 intermixed with another 40 novel faces (order of stimuli randomized). Each trial started with a  
347 600-800 ms fixation cross followed by a face presented for 1500 ms and subjects responded  
348 whether the face was familiar or not without any time limitation. Four subjects had to be  
349 excluded from this part of the analysis due to technical failures during data acquisition.

350 **Statistical Analysis.** All data analyses were performed using SPSS 23.0 software (SPSS Inc.,  
351 Chicago, Illinois, USA). In all cases, data from ratings, recognition memory and indicating  
352 interest in having either a short- or long-term relationship with a target individual were subjects  
353 to four (analysis of placebo group alone) or five (analysis of placebo vs. oxytocin treatment



354 groups) factor repeated-measures ANOVAs and significant ( $p < 0.05$ ) main effects and relevant  
355 interactions reported. Significant interactions were explored using Simple Effect Tests, which  
356 were all Bonferroni-corrected for multiple comparisons. For both ANOVAs and post-hoc tests  
357 measures of effect size are given (Partial eta squared ( $\eta^2_p$ ) or Cohen's  $d$ ). Small, medium, and  
358 large effects were represented respectively as 0.01, 0.06, and 0.14 for  $\eta^2_p$ , 0.20, 0.50, and 0.80  
359 for Cohen's  $d$ <sup>50</sup>.

360

### 361 **References**

- 362 1. Lansford, J. E. Parental divorce and children's adjustment. *Perspect. Psychol. Sci.* **4**,  
363 140–152 (2009).
- 364 2. Knopp, K. *et al.* Once a Cheater, Always a Cheater? Serial Infidelity Across  
365 Subsequent Relationships. *Arch. Sex. Behav.* **46**, 2301–2311 (2017).
- 366 3. Buss, D. M. & Schmitt, D. P. Sexual Strategies Theory: An evolutionary perspective  
367 on human mating. *Psychol. Rev.* **100**, 204–232 (1993).
- 368 4. Buss, D. M., Larsen, R. J., Westen, D. & Semmelroth, J. Sex differences in jealousy:  
369 Evolution, physiology, and psychology. *Psychol. Sci.* **3**, 251–256 (1992).
- 370 5. Buss, D. M. Sexual and emotional infidelity: Evolved gender differences in jealousy  
371 prove robust and replicable. *Perspect. Psychol. Sci.* **13**, 155–160 (2018).
- 372 6. Oliver, B. M. & Hyde, S. J. Gender Differences in Sexuality: A Meta- Analysis.  
373 *Psychol. Bull.* **114**, 29–51 (1993).
- 374 7. Penton-Voak, I. S. *et al.* Menstrual cycle alters face preference. *Nature* **399**, 741  
375 (1999).
- 376 8. Lammers, J. & Maner, J. Power and Attraction to the Counternormative Aspects of  
377 Infidelity. *J. Sex Res.* **53**, 54–63 (2016).
- 378 9. Place, S. S., Todd, P. M., Penke, L. & Asendorpf, J. B. Humans show mate copying  
379 after observing real mate choices. *Evol. Hum. Behav.* **31**, 320–325 (2010).
- 380 10. Fitzgerald, F. S. *The Great Gatsby*. (Charles Scribner's Sons, 1925).
- 381 11. Donaldson, Z. R. & Young, L. J. Oxytocin, Vasopressin, and the Neurogenetics of  
382 Sociality. *Science*. **322**, 900–904 (2008).
- 383 12. Cavanaugh, J., Mustoe, A. C., Taylor, J. H. & French, J. A. Oxytocin facilitates  
384 fidelity in well-established marmoset pairs by reducing sociosexual behavior toward  
385 opposite-sex strangers. *Psychoneuroendocrinology* **49**, 1–10 (2014).
- 386 13. Scheele, D. *et al.* Oxytocin Modulates Social Distance between Males and Females. *J.*  
387 *Neurosci.* **32**, 16074–16079 (2012).
- 388 14. Scheele, D. *et al.* Oxytocin enhances brain reward system responses in men viewing  
389 the face of their female partner. *Proc. Natl. Acad. Sci.* **110**, 20308 LP-20313 (2013).
- 390 15. Preckel, K., Scheele, D., Kendrick, K. M., Maier, W. & Hurlmann, R. Oxytocin  
391 facilitates social approach behavior in women. *Front. Behav. Neurosci.* **8**, 191 (2014).

- 392 16. Hu, J. *et al.* Oxytocin selectively facilitates learning with social feedback and increases  
393 activity and functional connectivity in emotional memory and reward processing  
394 regions. *Hum. Brain Mapp.* **36**, 2132–2146 (2015).
- 395 17. De Dreu, C. K. W. & Kret, M. E. Oxytocin conditions intergroup relations through  
396 upregulated in-group empathy, cooperation, conformity, and defense. *Biol. Psychiatry*  
397 **79**, 165–173 (2016).
- 398 18. Luo, R. *et al.* Oxytocin facilitation of acceptance of social advice is dependent upon  
399 the perceived trustworthiness of individual advisors. *Psychoneuroendocrinology* **83**, 1–  
400 8 (2017).
- 401 19. Scheele, D. *et al.* Opposing effects of oxytocin on moral judgment in males and  
402 females. *Hum. Brain Mapp.* **35**, 6067–6076 (2014).
- 403 20. Gao, S. *et al.* Oxytocin, the peptide that bonds the sexes also divides them. *Proc. Natl.*  
404 *Acad. Sci.* **113**, 7650–7654 (2016).
- 405 21. Luo, L. *et al.* Sex-dependent neural effect of oxytocin during subliminal processing of  
406 negative emotion faces. *Neuroimage* **162**, 127–137 (2017).
- 407 22. Hurlmann, R. & Scheele, D. Dissecting the role of oxytocin in the formation and loss  
408 of social relationships. *Biol. Psychiatry* **79**, 185–193 (2016).
- 409 23. Fabre-Nys, C., Ohkura, S. & Kendrick, K. M. Male faces and odours evoke differential  
410 patterns of neurochemical release in the mediobasal hypothalamus of the ewe during  
411 oestrus: an insight into sexual motivation? *Eur. J. Neurosci.* **9**, 1666–1677 (1997).
- 412 24. Unkelbach, C., Guastella, A. J. & Forgas, J. P. Oxytocin selectively facilitates  
413 recognition of positive sex and relationship words. *Psychol. Sci.* **19**, 1092–1094  
414 (2008).
- 415 25. Gangestad, S. W. *et al.* How valid are assessments of conception probability in  
416 ovulatory cycle research? Evaluations, recommendations, and theoretical implications.  
417 *Evol. Hum. Behav.* **37**, 85–96 (2016).
- 418 26. Zhao, W. *et al.* Oxytocin biases men to be more or less tolerant of others' dislike  
419 dependent upon their relationship status. *Psychoneuroendocrinology* **88**, 167–172  
420 (2018).
- 421 27. Watson, D., Clark, L. A. & Tellegen, A. Development and validation of brief measures  
422 of positive and negative affect: the PANAS scales. *J. Pers. Soc. Psychol.* **54**, 1063  
423 (1988).
- 424 28. Costa, P. & McCrae, R. R. *The NEO-PI/NEO-FFI manual supplement.* (Psychological  
425 Assessment Resources, 1989).
- 426 29. Rosenberg, M. *Society and the adolescent self-image.* **11**, (Princeton university press  
427 Princeton, NJ, 1965).
- 428 30. Davis, M. H. A multidimensional approach to individual differences in empathy. *Cat.*  
429 *Sel. Doc. Psychol.* **40**, 3480 (1980).
- 430 31. Baron-Cohen, S., Wheelwright, S., Skinner, R., Martin, J. & Clubley, E. The autism-  
431 spectrum quotient (AQ): Evidence from asperger syndrome/high-functioning autism,  
432 males and females, scientists and mathematicians. *J. Autism Dev. Disord.* **31**, 5–17  
433 (2001).
- 434 32. Beck, A. T., Steer, R. A. & Brown, G. K. *Beck depression inventory-II.* **78**, (The  
435 Psychological Corporation, 1996).

- 436 33. Liebowitz, M. R. Social phobia. in *Anxiety* **22**, 141–173 (Karger Publishers, 1987).
- 437 34. Hatfield, E. & Sprecher, S. Measuring passionate love in intimate relations. *J. Adolesc.*  
438 **9**, 383–410 (1986).
- 439 35. Hendrick, C. & Hendrick, S. A theory and method of love. *J. Pers. Soc. Psychol.* **50**,  
440 392–402 (1986).
- 441 36. Siegrist, M., Keller, C., Barle, T. C. & Gutscher, H. Effects of general trust on  
442 cooperation in the investment game and in a social dilemma. *Unpubl. manuscript, Inst.*  
443 *Environ. Decis. Zurich, Switz.* (2005).
- 444 37. Brown, R. P. Measuring individual differences in the tendency to forgive: Construct  
445 validity and links with depression. *Personal. Soc. Psychol. Bull.* **29**, 759–771 (2003).
- 446 38. Berry, J. W., Worthington, E. L., O'Connor, L. E., Parrott, L. & Wade, N. G.  
447 Forgiveness, vengeful rumination, and affective traits. *J. Pers.* **73**, 183–226 (2005).
- 448 39. Guastella, A. J. *et al.* Recommendations for the standardisation of oxytocin nasal  
449 administration and guidelines for its reporting in human research.  
450 *Psychoneuroendocrinology* **38**, 612–625 (2013).
- 451 40. Zhao, W. *et al.* Oxytocin increases the perceived value of both self-and other-owned  
452 items and alters medial prefrontal cortex activity in an endowment task. *Front. Hum.*  
453 *Neurosci.* **11**, 272 (2017).
- 454 41. Xu, L. *et al.* Oxytocin enhances attentional bias for neutral and positive expression  
455 faces in individuals with higher autistic traits. *Psychoneuroendocrinology* **62**, 352–358  
456 (2015).
- 457 42. Shin, N. Y., Park, H. Y., Jung, W. H. & Kwon, J. S. Effects of Intranasal Oxytocin on  
458 Emotion Recognition in Korean Male: A Dose-Response Study. *Psychiatry Investig.*  
459 **15**, 710 (2018).
- 460 43. Striepens, N. *et al.* Elevated cerebrospinal fluid and blood concentrations of oxytocin  
461 following its intranasal administration in humans. *Sci. Rep.* **3**, (2013).
- 462 44. Quintana, D. S. *et al.* Saliva oxytocin measures do not reflect peripheral plasma  
463 concentrations after intranasal oxytocin administration in men. *Horm. Behav.* **102**, 85–  
464 92 (2018).
- 465 45. Paloyelis, Y. *et al.* A spatiotemporal profile of in vivo cerebral blood flow changes  
466 following intranasal oxytocin in humans. *Biol. Psychiatry* **79**, 693–705 (2016).
- 467 46. Spengler, F. B. *et al.* Kinetics and dose dependency of intranasal oxytocin effects on  
468 amygdala reactivity. *Biol. Psychiatry* **82**, 885–894 (2017).
- 469 47. Lee, M. R. *et al.* Oxytocin by intranasal and intravenous routes reaches the  
470 cerebrospinal fluid in rhesus macaques: determination using a novel oxytocin assay.  
471 *Mol. Psychiatry* **23**, 115 (2018).
- 472 48. Quintana, D. S. *et al.* Low dose intranasal oxytocin delivered with Breath Powered  
473 device dampens amygdala response to emotional stimuli: A peripheral effect-  
474 controlled within-subjects randomized dose-response fMRI trial.  
475 *Psychoneuroendocrinology* **69**, 180–188 (2016).
- 476 49. Takahashi, H. *et al.* Men and women show distinct brain activations during imagery of  
477 sexual and emotional infidelity. *Neuroimage* **32**, 1299–1307 (2006).
- 478 50. Cohen, J. The Effect Size index: d. in *Statistical Power Analysis for the Behavioral*  
479 *Sciences* 20–26 (1988).

480

481 **ACKNOWLEDGEMENTS**

482 We thank Professor Trevor Robbins for valuable discussions and suggestions on the paper and its findings.

483 **Funding:** This project was supported by National Natural Science Foundation of Science (NSFC) grant number

484 31530032. **Author contributions:** LX and KMK designed the experiment. LX, RL, XZ and WZ carried out the

485 experiment. LX, KMK, BB and QZ analyzed the experiment and LX, KMK and BB wrote the paper. All authors

486 contributed to the conception of the study and approved the paper. **Competing interests:** The authors declare that

487 they have no competing interests.

488

489 **Figures**

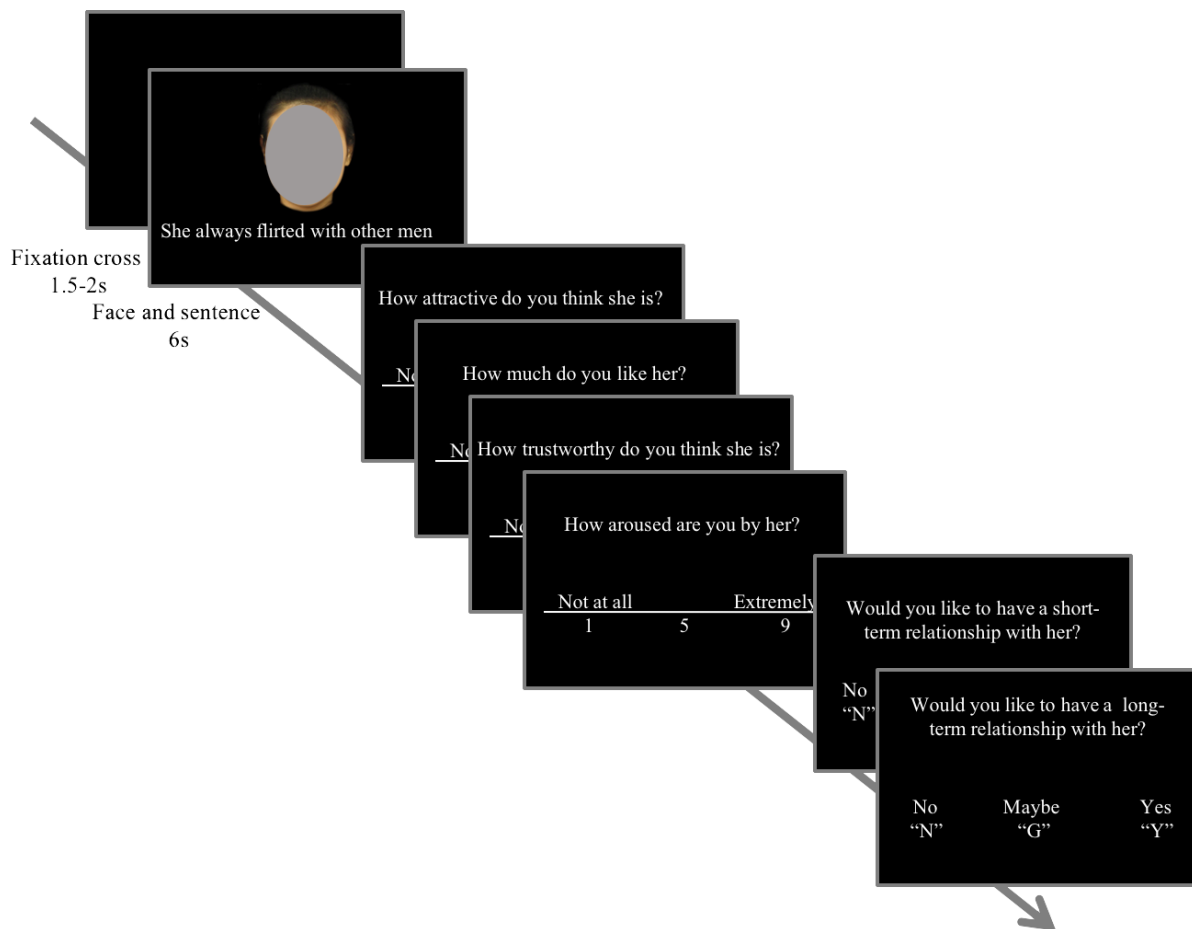

490

491 **Fig. 1.** Example of a single trial in the rating task. Following a 1.5~2 second fixation cross, each facial  
492 picture (unknown, opposite sex) was shown for 6 seconds and paired with a sentence describing a behavior  
493 indicative of fidelity or infidelity (either emotional or sexual) he/she exhibited during a previous relationship.  
494 Each subject viewed 10 trials for each fidelity/infidelity type - emotional fidelity, sexual fidelity, emotional  
495 infidelity and sexual infidelity. For mate choices, the decisions “yes”, “maybe” and “no”, were scored  
496 numerically as 2, 1 and 0 respectively and this was used to create an overall “Interest Index” indicating  
497 willingness to have a relationship with the person.

498

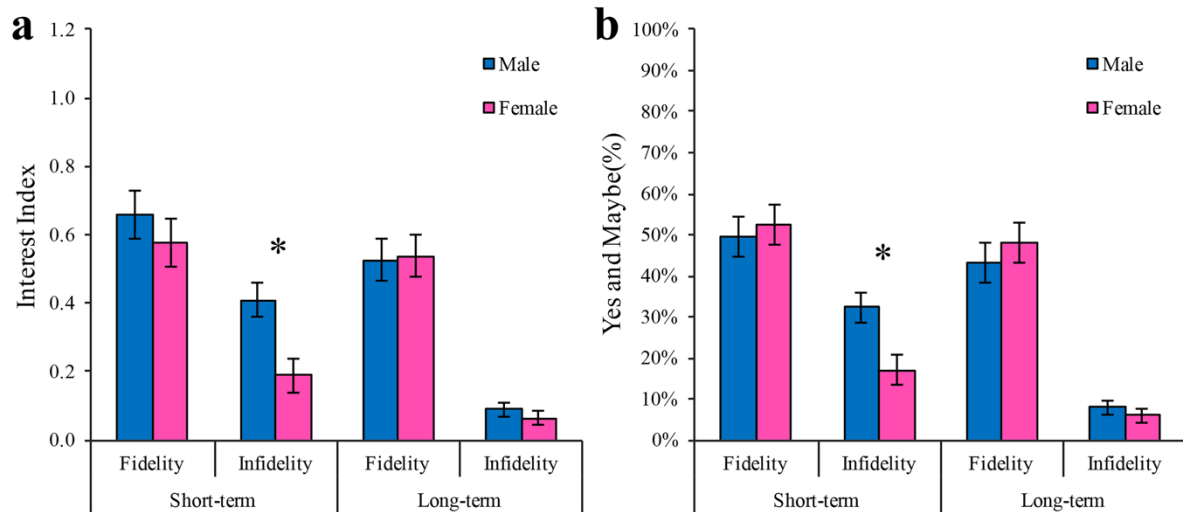

499

500 **Fig. 2.** Sex difference in preference for a short-term, but not long-term, relationship with individuals showing

501 previous infidelity in the placebo (PLC) treated group. **a**, Analysis using an interest index (derived from

502 scores from decisions made on each face, with: “yes” = 2, “maybe” = 1, “no” = 0). **b**, the percentage of

503 yes/maybe responses made by subjects for having a relationship with individuals in the four categories. Data

504 from single individuals and those in a relationship are combined. Bars represent means and standard errors.

505 \* $p < 0.05$  for males vs. females.

506

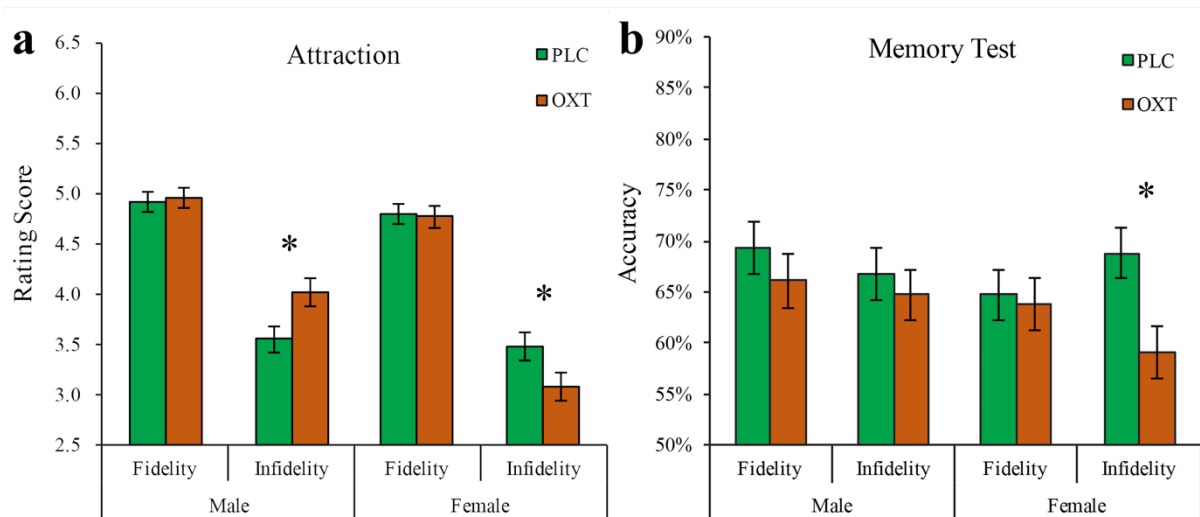

507

508 **Fig. 3.** Effects of oxytocin (OXT) on attraction (a) and recognition memory (b) for faces of the opposite sex

509 associated with previous fidelity or infidelity in all male and female subjects. Bars represent means and

510 standard errors. \* $p < 0.05$  OXT vs. placebo (PLC).

511

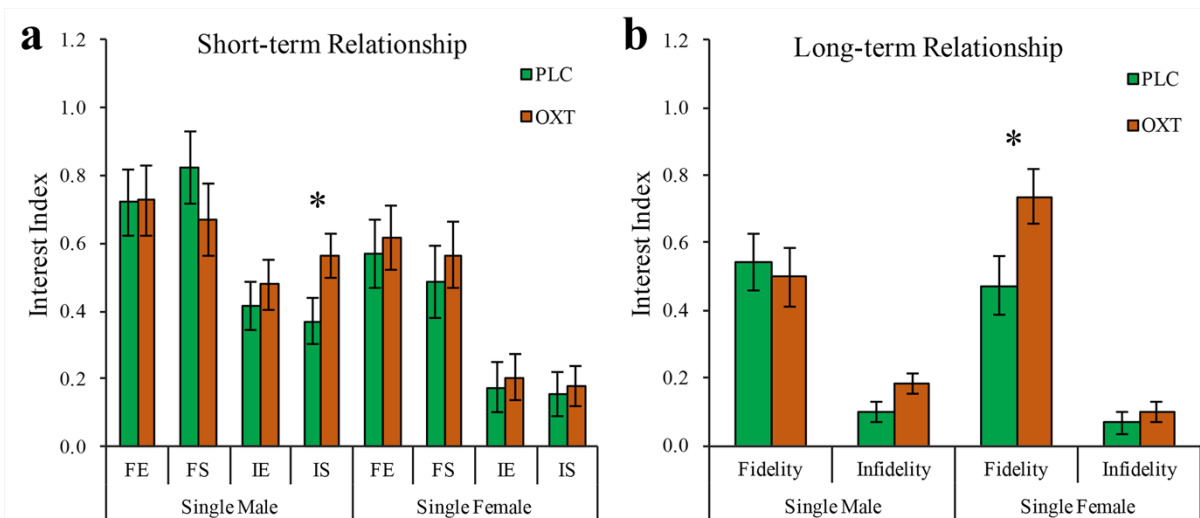

512

513 **Fig. 4.** Effect of oxytocin (OXT) on interest in single male and female subjects for having a short-term (a)

514 or long-term relationship (b) with an individual of the opposite sex associated with previous (emotional or

515 sexual) fidelity or infidelity (FE = emotional fidelity; FS = sexual fidelity; IE = emotional infidelity; IS =

516 sexual infidelity). The interest index is derived from scores from decisions made on each face, with: “yes”

517 = 2, “maybe” = 1, “no” = 0. Bars represent means and standard errors. \* $p < 0.05$  OXT vs. placebo (PLC).

## 518 **Supporting Information**

### 519 **Oxytocin amplifies evolutionary sex differences in human mate choice**

520 Lei Xu, Benjamin Becker, Ruixue Luo, Xiaoxiao Zheng, Weihua Zhao, Qiong Zhang and  
521 Keith M. Kendrick\*

522

523 The Clinical Hospital of Chengdu Brain Science, MOE Key Laboratory for  
524 NeuroInformation, University of Electronic Science and Technology of China, Chengdu  
525 611731, China.

526 A separate analysis of face attractiveness and likeability ratings revealed similar findings to  
527 those reported in the main paper using the two combined. In placebo control group, (marginal)  
528 type x sex interactions were found for face attractiveness ( $F(1,76) = 3.873, p = 0.053, \eta^2_p =$   
529  $0.048$ ) and likeability ratings ( $F(1,76) = 4.786, p = 0.032, \eta^2_p = 0.059$ ). Post-hoc comparisons  
530 showed that women give higher face attraction ( $p = 0.071, d = 0.136$ ) and likeability ( $p = 0.001,$   
531  $d = 0.366$ ) rating scores to men who showed emotional fidelity or infidelity than those who  
532 showed sexual fidelity or infidelity. For oxytocin effects, significant fidelity x treatment x sex  
533 interactions were found for both face attractiveness ( $F(1,152) = 8.244, p = 0.005, \eta^2_p = 0.051$ )  
534 and likeability ratings ( $F(1,152) = 6.021, p = 0.015, \eta^2_p = 0.038$ ). Post-hoc comparisons showed  
535 that in men oxytocin increased both face attraction ( $p = 0.032, d = 0.455$ ) and likeability of  
536 previously unfaithful women ( $p = 0.016, d = 0.511$ ), while in women oxytocin decreased  
537 attractiveness ( $p = 0.016, d = 0.529$ ) but not likeability ( $p = 0.183$ ) of previously unfaithful  
538 men (see Fig. S1). There were no significant oxytocin effects on face attractiveness or  
539 likeability of previously faithful men and women (all  $ps > 0.458$ ).

540 Repeated-measures ANOVAs on the percentage of “yes/maybe” responses for mate  
541 choice reveals similar finding to those reported in the main paper using interest index. In  
542 placebo control group, there was a significant fidelity x sex interaction on mate choice for a



543 short-term relationship ( $F(1,76) = 10.621, p = 0.002, \eta^2_p = 0.123$ , see Fig. 2). For the effect of  
544 oxytocin there was a significant fidelity x type x treatment x sex x relationship status interaction  
545 ( $F(1,152) = 4.398, p = 0.038, \eta^2_p = 0.028$ ) in short-term relationship preference and a significant  
546 fidelity x treatment x sex x relationship status interaction ( $F(1,152) = 4.811, p = 0.030, \eta^2_p =$   
547  $0.031$ ) in long-term relationship preference were found (see Fig. S2).

548 Repeated-measures ANOVAs added menstrual cycle as a between-subjects factor in  
549 female subjects suggested that the stage of their menstrual cycle did not influence our findings.  
550 There were no significant interactions related to menstrual cycle for mate choice, memory and  
551 rating scores in the placebo group (all  $ps > 0.089$ ). For the effects of oxytocin there were also  
552 no significant interactions involving menstrual cycle, treatment and fidelity for either mate  
553 choice or rating scores or recognition memory accuracy (all  $ps > 0.128$ ).

554

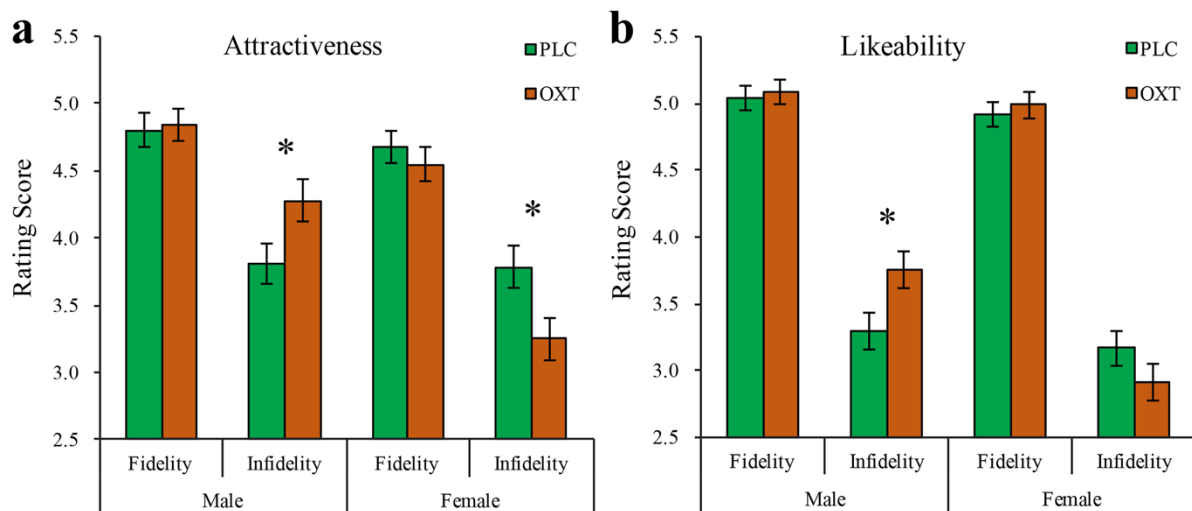

555

556 **Fig. S1.** Effects of oxytocin (OXT) on attractiveness (a) and likeability (b) for faces of the opposite sex

557 associated with previous fidelity or infidelity in all male and female subjects. Bars represent means and

558 standard errors. \* $p < 0.05$  OXT vs. placebo (PLC).

559

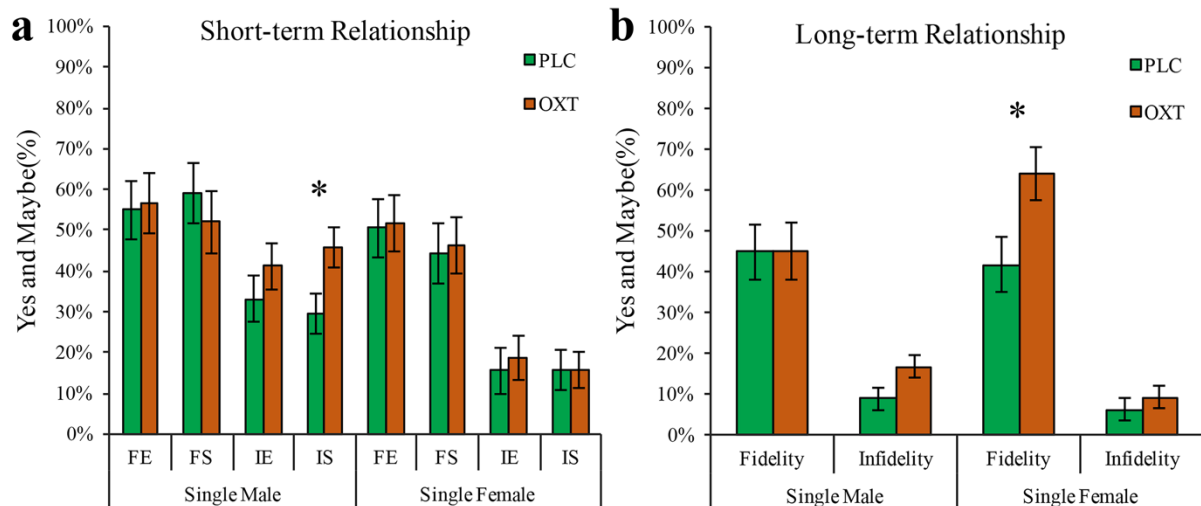

560

561 **Fig. S2.** Effect of oxytocin (OXT) on percentage of yes/maybe responses in single male and female

562 subjects for having a short-term (a) or long-term relationship (b) with an individual of the opposite sex

563 associated with previous (emotional or sexual) fidelity or infidelity (FE = emotional fidelity; FS = sexual

564 fidelity; IE = emotional infidelity; IS = sexual infidelity). Bars represent means and standard errors. \* $p <$

565 0.05 OXT vs. placebo (PLC).

566

567 **Table S1.** Ages and questionnaire scores in the four experimental groups (mean±S.E.M.)

| Measurements                                            | Placebo   |          | Oxytocin |          | Sex x Treatment |
|---------------------------------------------------------|-----------|----------|----------|----------|-----------------|
|                                                         | Male      | Female   | Male     | Female   | $p$ -value      |
| Age(years)                                              | 23.0±0.3  | 22.8±0.3 | 22.9±0.3 | 22.7±0.3 | 0.905           |
| Beck Depression Inventory (BDI-II)                      | 8.2±0.8   | 7.9±1.2  | 8.9±1.2  | 7.2±0.9  | 0.516           |
| Autism Spectrum Quotient (ASQ)                          | 20.1±0.7  | 20.7±0.9 | 20.9±0.6 | 19.7±0.8 | 0.221           |
| General Trust Scale (GTS)                               | 32.0±0.5  | 31.6±0.6 | 31.1±0.6 | 31.8±0.7 | 0.380           |
| Tendency to Forgive Scale (TFS)                         | 32.8±0.9  | 32.5±0.9 | 32.2±0.8 | 30.9±1.0 | 0.585           |
| Trait Forgivingness Scale (TTF)                         | 14.4±0.5  | 14.3±0.5 | 14.1±0.6 | 13.9±0.7 | 0.896           |
| Attitudes toward Forgiveness Scale (ATF)                | 28.6±0.6  | 27.9±0.7 | 27.4±0.6 | 26.5±0.7 | 0.895           |
| Passionate Love Scale (PLS)                             | 103.1±2.4 | 99.0±2.3 | 97.9±2.0 | 96.7±2.5 | 0.531           |
| Self-Esteem Scale (SES)                                 | 30.5±0.7  | 31.3±0.6 | 30.5±0.6 | 30.8±0.8 | 0.755           |
| Interpersonal Reactivity Index (IRI)                    | 50.3±1.6  | 51.9±1.5 | 45.8±1.4 | 50.8±1.6 | 0.256           |
| Positive and Negative Affective Scale (PANAS) -Positive | 31.5±0.8  | 29.2±0.9 | 28.9±0.9 | 28.5±1.0 | 0.285           |
| Positive and Negative Affective Scale (PANAS) -Negative | 21.6±1.3  | 18.1±1.1 | 19.3±1.1 | 18.0±1.0 | 0.337           |
| Liebowitz's Social Anxiety Scale (LSAS)-Avoid           | 20.9±1.9  | 19.1±1.8 | 20.7±1.4 | 21.5±1.9 | 0.476           |
| Liebowitz's Social Anxiety Scale (LSAS)-Fear            | 24.3±2.0  | 21.6±1.6 | 22.6±1.5 | 25.3±2.1 | 0.143           |
| NEO-Five Factor Inventory-Agreeableness                 | 42.3±0.7  | 41.4±0.6 | 40.6±0.6 | 40.9±0.8 | 0.355           |
| NEO-Five Factor Inventory-Conscientiousness             | 42.5±0.8  | 41.7±0.7 | 41.4±0.8 | 42.3±0.8 | 0.252           |

|                                        |          |          |          |          |       |
|----------------------------------------|----------|----------|----------|----------|-------|
| NEO-Five Factor Inventory-Extraversion | 41.1±0.8 | 38.8±1.0 | 40.0±1.0 | 40.8±0.8 | 0.090 |
| NEO-Five Factor Inventory-Neuroticism  | 34.2±1.3 | 34.5±1.1 | 34.4±1.1 | 34.1±1.2 | 0.770 |
| NEO-Five Factor Inventory-Openness     | 40.4±0.7 | 38.2±0.9 | 39.9±0.8 | 39.3±0.8 | 0.326 |
| Love Attitude Scale (LAS)-Agape        | 26.9±0.6 | 22.0±0.5 | 25.3±0.6 | 20.8±0.5 | 0.781 |
| Love Attitude Scale (LAS)-Eros         | 24.0±0.5 | 23.5±0.5 | 23.5±0.6 | 23.6±0.6 | 0.633 |
| Love Attitude Scale (LAS)-Ludus        | 19.4±0.7 | 19.0±0.6 | 19.8±0.5 | 18.9±0.5 | 0.683 |
| Love Attitude Scale (LAS)-Mania        | 21.3±0.7 | 19.7±0.7 | 21.1±0.6 | 19.9±0.7 | 0.734 |
| Love Attitude Scale (LAS)-Pragma       | 22.6±0.7 | 23.1±0.6 | 20.9±0.7 | 23.0±0.6 | 0.207 |
| Love Attitude Scale (LAS)-Storge       | 22.9±0.8 | 21.5±0.7 | 21.3±0.8 | 21.7±0.8 | 0.243 |

568

569 **Table S2.** Examples of sentences describing sexual and emotional fidelity or infidelity

| Type                 | Sentence Examples                                                                                                                                                                                        |
|----------------------|----------------------------------------------------------------------------------------------------------------------------------------------------------------------------------------------------------|
| Emotional Fidelity   | He/She always ignored other women/men who tried to flirt with him/her.<br>He/She always refused to go out on a date with other women/men.                                                                |
| Sexual Fidelity      | He/She threw wine on his/her female/male client's face when she/he tried to seduce him/her.<br>He/She refused to have sex with his/her boss even though that would have resulted in gaining a promotion. |
| Emotional Infidelity | He/She expressed his/her love to another woman/man without his/her girlfriend/boyfriend knowing.<br>He/She sent many romantic text messages to another woman/man.                                        |
| Sexual Infidelity    | He/She had sex with girlfriend's/boyfriend's best friend.<br>He/She gave another woman/man oral sex.                                                                                                     |

570
